1 **Discovery and evaluation of a novel step in the flavonoid biosynthesis pathway regulated by**  
2 **F3H gene using a yeast expression system**

3

4

5

6 Rahmatullah Jan<sup>1</sup>, Sajjad Asaf<sup>2</sup>, Sanjita Paudel<sup>3</sup>, Sangkyu Lee<sup>3</sup>, Kyung-Min Kim<sup>1\*</sup>

7

8 <sup>1</sup>Division of Plant Biosciences, School of Applied Biosciences, College of Agriculture & Life  
9 Science, Kyungpook National University, 80 Dahak-ro, Buk-gu, Daegu, 41566, Republic of  
10 Korea

11 <sup>2</sup>Natural and Medical Science Research Center, University of Nizwa 616, Oman

12 <sup>3</sup>College of Pharmacy, Research Institute of Pharmaceutical Sciences, Kyungpook National  
13 University, 80 Dahak-ro, Buk-gu, Daegu, 41566, Republic of Korea

14

15 \*Corresponded authors; K.M. Kim, [kkm@knu.ac.kr](mailto:kkm@knu.ac.kr);

16 **Rahmatullah Jan; [rehmatbot@yahoo.com](mailto:rehmatbot@yahoo.com)**

17 **Sajjad Asaf; [sajadasif2000@gmail.com](mailto:sajadasif2000@gmail.com)**

18 **Sanjita Paudel; [sanjitapdl99@gmail.com](mailto:sanjitapdl99@gmail.com)**

19 **Sangkyu Lee; [pharm239@gmail.com](mailto:pharm239@gmail.com)**

20

21 **Highlights**

- 22
- 23 • Current study is a discovery of a novel step in flavonoid biosynthesis pathway of rice  
24 plant.
  - 25 • In this study F3H gene from rice plant was functionally expressed in yeast expression  
system.

- 26       • Results confirmed that, F3H gene is responsible for the canalization of naringenin and  
27       converted into kaempferol and quercetin.
- 28       • The results were confirmed through, western blotting, TLC, HPLC and NMR analysis.

29

30

31

32

### 33   **Abstract**

34   Kaempferol and quercetin are the essential plant secondary metabolites that confer huge  
35   biological functions in the plant defense system. These metabolites are produced in low  
36   quantities in plants, therefore engineering microbial factory is a favorable strategy for the  
37   production of these metabolites. In this study, biosynthetic pathways for kaempferol and  
38   quercetin were constructed in *Saccharomyces cerevisiae* using naringenin as a substrate. The  
39   results elucidated a novel step for the first time in kaempferol and quercetin biosynthesis directly  
40   from naringenin catalyzed by flavonol 3-hydroxylase (*F<sub>3</sub>H*). *F<sub>3</sub>H* gene from rice was cloned into  
41   pRS42K yeast episomal plasmid (YEP) vector using BamH1 and Xho1 restriction enzymes. We  
42   analyzed our target gene activity in engineered and in empty strains. The results were confirmed  
43   through TLC followed by Western blotting, nuclear magnetic resonance (NMR), and LC-MS.  
44   TLC showed positive results on comparing both compounds extracted from the engineered strain  
45   with the standard reference. Western blotting confirmed lack of *Oryza sativa* flavonol 3-  
46   hydroxylase (*OsF<sub>3</sub>H*) activity in empty strains while high *OsF<sub>3</sub>H* expression in engineered  
47   strains. NMR spectroscopy confirmed only quercetin, while LCMS-MS results revealed that *F<sub>3</sub>H*  
48   is responsible for naringenin conversion to both kaempferol and quercetin. These results  
49   concluded that rice *F<sub>3</sub>H* catalyzes naringenin metabolism via hydroxylation and synthesizes  
50   kaempferol and quercetin.

51

52 Key words: Flavonol 3-hydroxylase, kaempferol, naringenin, nuclear magnetic resonance, yeast  
53 episomal plasmid, hydroxylation

54  
55  
56  
57  
58  
59  
60  
61

## 62 **Introduction**

63 Flavonoids and isoflavonoids are essential plant aromatic secondary metabolites. They cover a  
64 very large family of approximately 9000 known phenolic compounds that mediate diverse  
65 biological functions and exert significant ecological impacts. Flavonoids class encompasses  
66 approximately 1000 known compounds (Tahara, 2007) including anthocyanin, proanthocyanidin,  
67 and phlobaphene pigments, as well as flavonol, flavone, and isoflavone with their respective  
68 biological functions in host species (Grotewold, 2005; Lepiniec et al., 2006; Subramanian et al.,  
69 2007). With regard to plant biological activities, flavonoids mostly play a role in plant defense  
70 system, antimicrobial activity, UV light protection, and fragmentation to different plant parts  
71 (Dixon and Steele, 1999; Martens and Mithofer, 2005). Researcher reported that some flavonoids  
72 are involved in auxin transport inhibition, have allelopathic activity, and regulate reactive oxygen  
73 species in plants (Buer et al., 2010). Among flavonoids, kaempferol and quercetin are the  
74 predominant naturally occurring phenolic flavonol compounds with a common flavone nucleus.  
75 Both these compounds are of great importance because of their anti-cancer, cardio-protective,  
76 and anti-inflammatory activities (Chou et al., 2013). Furthermore, they inhibit the growth of  
77 cancer cells, induce apoptosis of cancer cells, and preserve normal cell viability (Chen and Chen,  
78 2013). Kaempferol and quercetin are present in the glycoside form in nature and have numerous  
79 biological functions like antioxidant, anti-diabetes, anti-inflammatory, antimicrobial, and anti-  
80 fungal activities (Ozcelik et al., 2006; Zang et al., 2011).

81 In plants, kaempferol and quercetin biosynthetic pathway is well developed and synthesized by  
82 complexes of various enzymes, via phenylpropanoid pathway from aromatic amino acids like  
83 phenylalanine and tyrosine (Muthukrishnan et al., 2015). At a very early step in the flavonoid  
84 biosynthesis pathway, phenylalanine is converted to naringenin through a series of reactions  
85 catalyzed by various enzymes. Naringenin is the main intermediate compound responsible for  
86 the synthesis of various flavonoids, depending on the enzymes it interacts with (Duan et al.,  
87 2017). Similarly, in case of kaempferol and quercetin biosynthesis, flavanone 3-hydroxylase  
88 (*F<sub>3</sub>H*) uses naringenin as a substrate and converts it into dihydrokaempferol and further into  
89 dihydroquercetin (Deboo et al., 1995). Flavonols (kaempferol & quercetin) are synthesized from  
90 dihydrokaempferol and dihydroquercetin when they are catalyzed by flavonol synthase (*FLS*)  
91 (Kim et al., 2014). Previous reports showed that kaempferol and quercetin are synthesized by  
92 activation of different enzymes in different organisms. For example, functional expression of  
93 *Petroselinum crispum*, naringenin 3-dioxygenase (*N3DOX*) in yeast generate dihydrokaempferol  
94 which further produces dihydroquercetin kaempferol and quercetin by activation of their  
95 respective enzymes (Marín et al., 2018). Similarly, cytochrome P450 flavonoid monooxygenase  
96 (*FMO*), which was fused in-frame to the cytochrome P450 reductase (*CPR*) from *Catharanthus*  
97 *roseus*, were expressed in yeast and produced quercetin from kaempferol (Rodriguez et al., 2017).  
98 This mechanism showed that kaempferol directly converted to quercetin due to activation of  
99 *FMO/CPR*, however in Arabidopsis, dihydrokaempferol first converts into dihydroquercetin due  
100 to *F3H* enzyme, which further converts to quercetin by *FLS* enzyme (Yin et al., 2012). In lotus  
101 dihydrokaempferol produces kaempferol by regulation of dihydroflavonol reductase (*DFR*)  
102 while enzyme responsible for quercetin was unknown (Chen et al., 2013). The proposed pathway  
103 of flavonols in *Rubus* shows that, naringenin is hydroxylated by *F3H* being converted in  
104 dihydrokaempferol which produced kaempferol by activation of *FLS*. Further kaempferol  
105 produce dihydroquercetin which is a precursor of quercetin Gutierrez et al. (2017). Naringenin  
106 conversion to different flavonoids is caused by the addition of a hydroxyl group to different  
107 positions of the compound, depending on the enzymes interacting with it (Deboo et al., 1995).  
108 Previously, Leonard et al. (2006) and Miyahisa et al. (2006) reported kaempferol synthesis in  
109 *Escherichia coli* using L-Tyrosin as a substrate and cloned the entire pathway, whereas Leonard  
110 et al. (2006) used p-coumaric acid as the substrate of kaempferol and quercetin in *E. coli* and

111 cloned only the downstream pathway. On the bases of proposed pathway, we hypothesized that  
112 *F3H* is not only responsible for naringenin conversion to dihydrokaempferol and  
113 dihydroquercetin but also responsible for direct conversion to kaempferol and quercetin which is  
114 a novel step, not reported up to date. Furthermore it is demonstrated that, *F3H* also converts  
115 kaempferol into quercetin.

116 The aim of the present study is to evaluate the function of *OsF<sub>3</sub>H* gene in the production of  
117 kaempferol and quercetin from naringenin. Like other researchers, we did not clone the entire  
118 pathway, but cloned only *OsF<sub>3</sub>H* gene the very key step in the flavonoid biosynthesis pathway.  
119 To assist with the expression level of the related gene, its function and quantification of quercetin  
120 and kaempferol by naringenin as a substrate, in *S. cerevisiae*.

121

122

## 123 **Material and methods**

### 124 **Plant material and growth conditions**

125 In the current study, *Oryza sativa japonica* type Nogdong cultivar of Plant Molecular Breeding  
126 Lab Kyungpook National University South Korea was used. Before growing, seeds were surface  
127 sterilized overnight with 1 ml/l bleach. On the following day, seeds were washed three times  
128 with double distilled water and soaked for two days at 34°C. After soaking, the seeds were sown  
129 on autoclaved soil and incubated for two days in dark condition. The seeds started to grow in  
130 dark condition and were then transferred to a greenhouse, keeping the temperature constant at  
131 25°C, and the RNA was extracted after two weeks.

132

### 133 **cDNA library and PCR**

134 Total RNA was isolated from 2-week-old plant leaves using RNeasy Mini Kit (QIAGEN)  
135 Germany, according to the manufacturer's instructions. Super-standard cDNAs were synthesized  
136 using qPCRBio cDNA Synthesis Kit (pcrbiosystem) as per manufacturer's protocol. To amplify  
137 the coding region of *OsF<sub>3</sub>H* gene, specific primers were designed in NCBI for the PCR reaction.  
138 A total sample volume of 50 µl was subjected to the following conditions: initial denaturation at

139 94°C for 5 min, 40 cycles of denaturation at 94°C for 30 s, annealing at 58°C for 30 s, extension  
140 at 72°C for 1 min, and final extension at 72°C for 5 min. The PCR products were extracted using  
141 1% gel and purified using the PCR purification kit.

142

### 143 **Cloning and construction of plasmids**

144 The construct for transformation to yeast was prepared in three steps via restriction-based  
145 cloning: (1) insert preparation, (2) construction of vector, and (3) ligation process. To make the  
146 insert, the gene was amplified with the forward primer “ggatcc  
147 ATGGCGCCGGTGGCCACGACGTT” having the BamH1 site and reverse primer “ctcgag  
148 TCACTGCTCTGACGAAGCAACAGAGCAG” with the Xho1 site and purified by gel  
149 electrophoresis using Qiagen QIAquick Gel Extraction Kit (Cat # 28706). The purified insert  
150 was treated with BamH1 and Xho1 restriction enzymes (New England BioLabs) via incubation  
151 at 37°C for 4 h. To prevent methylation, 40 µl of the insert was treated with 2 µl Dpn1 enzyme in  
152 the presence of 1 µl Cutsmart buffer (10×) (New England BioLabs) for 2 h at 37°C. At the same  
153 time, pRSk42 vector was also treated with BhamH1 and Xho1 enzymes for 4 h at 37°C. After  
154 cutting with restriction enzymes, vector was treated with CIP enzyme (New England BioLabs) to  
155 reduce the chances of phosphorylation of vector ends. In the last step, the insert was ligated to  
156 the vector in ratio of 5:1, respectively, in the presence of Quick Ligase enzyme and 2× Quick  
157 Ligase Reaction buffer (New England BioLabs). Before transfer to the yeast, the construct was  
158 transformed to *E. coli* JM109 cells via the heat shock method as pRS42k plasmid amplifies in  
159 both *E. coli* as well as yeast cells but expresses only in yeast cells. Transformation was  
160 confirmed by the isolation of the plasmid DNA from *E. coli*, digestion with restriction enzymes,  
161 and the observation of two expected bands of the vector and target gene.

162

### 163 **Strain and media**

164 *E. coli* DH5α and *S. cerevisiae* D452-2 were the strains used in this experiment, having pRS42k  
165 plasmid with PGK1 promoter and CYC1 terminator in both *E. coli* and yeast. YPD media (1%  
166 yeast extract, 2% peptone, and 2% glucose) were used as the basal media for the routine growth

167 of yeast described by (Sherman, 2002). After autoclaving the solid and liquid media, 150 mg/L  
168 of Geneticin (G418) and Spectinomycin (Invitrogen) each were added as selection markers after  
169 cooling.

170

## 171 **Transformation to yeast**

172 *S. cerevisiae* transformation was carried out via lithium acetate/single stranded carrier  
173 DNA/polyethylene glycol (LiAc/SScarrierDNA/PEG) method (Gietz and Schiestl, 2007). The  
174 yeast strain was grown overnight in 10 ml YPD medium at 30°C in a shaker at 200 rpm; further,  
175 250 ml YPD culture flask was incubated. After 12–14 h incubation, the titer of yeast culture was  
176 determined by adding 10 µl cells into 1 ml water in a spectrophotometer cuvette and observing  
177 the OD at 600 nm. Subsequently,  $2.5 \times 10^8$  cells were added to 50 ml of pre-warmed YPD into a  
178 pre-warmed flask with the titer of  $5 \times 10^6$ . The flask was incubated at 30°C and 200 rpm for  
179 about 4 h, after which the cells were harvested and washed with 30 ml water and again rewashed  
180 in 1 ml water. Finally, the cells were resuspended in 1 ml of water by vortexing. Simultaneously,  
181 single stranded carrier DNA (Salmons perm DNA, Sigma Chemical Co. Ltd, cat. no. D-1626)  
182 was incubated for 5 min in a boiling water bath for denaturation and chilled on ice immediately.  
183 PEG 50% w/v (add 50 g of PEG 3350 to 30 ml of sterile water) and LiAC 1.0 M (autoclave 10.2  
184 g LiAC with 100 ml water for 20 min) were prepared. Following this, 360 µl transformation mix  
185 (35 µl plasmid, 36 µl LiAC, 240 µl PEG, and 50 µl of SS carrier DNA) was added to 100 µl of  
186 transformation tube (yeast cells) and vortexed vigorously. The cells were incubated at 42°C for  
187 40 min in a water bath and then harvested by centrifugation for 30 s at 13000 rpm. The  
188 supernatant was discarded and the cells were resuspended in 1 ml distilled water by pipetting and  
189 40 µl of cells were plated on each selection media. The plates were incubated for 3 days at 30°C  
190 and the transformants were counted.

191

## 192 **Colony PCR**

193 Following the method described by Ling et al. (1995), fresh yeast colonies were used directly for  
194 PCR without plasmid purification to confirm gene transformation. Template DNA was prepared

195 by adding a single colony picked using a sterile toothpick to 30  $\mu$ l of 0.03 M NaOH; the mixture  
196 was vortexed vigorously and boiled for 3 min. This was followed by centrifugation at 5000 rpm  
197 for 1 min. The supernatant was discarded and 2  $\mu$ l of the pellet was used as template DNA. This  
198 method is highly accurate compared with the old method of adding yeast directly to PCR tubes.  
199 All the PCR conditions were the same as those describe previously except the initial denaturation  
200 time, which was set at 5 min. PCR products were evaluated on 1% gel and target DNA was  
201 visualized using a gel manager.

202

### 203 **Protein isolation and Western blot analysis**

204 The protein was isolated from yeast strains according to the method described by (Chen et al.,  
205 2006) with a minor modification. Yeast strain (10 ml) was collected in a 50-ml falcon tube and  
206 centrifuged at 5000 rpm for 5 min at 4°C. The supernatant was discarded and the pellet was  
207 resuspended in 5 ml TEK buffer solution (50 mM Tris pH 7.5, 2 mM EDTA, and 100 mM KCl)  
208 and centrifuged again at 5000 rpm for 5 min. The pellet was resuspended in 5 ml TES buffer  
209 solution (50 mM Tris pH 7.5, 2 mM EDTA, 0.8 M sorbitol, 20 mM mercaptoethanol, and 2 mM  
210 phenylmethylsulfonyl fluoride) and disrupted by bead beating. Then, 140 mM PEG3350 and 0.2  
211 g/ml NaCl were added to the supernatant and the mixture was incubated on ice for 15 min. After  
212 incubation, the samples were centrifuged for 10 min at 10000 rpm and the pellet was  
213 resuspended in 100  $\mu$ l of TEG solution (50 mM Tris pH 7.5, 2 mM EDTA, and 40% glycerol).  
214 Protein concentrations were determined by Bradford method (Bradford, 1976); the standard  
215 curve shown in **Supplementary Fig. 1**. The isolated protein (20  $\mu$ g) was loaded for separation on  
216 12% polyacrylamide gel as described by Laemmli (1970). After separation on polyacrylamide  
217 gel, the protein was electro-transferred to nitrocellulose membrane (using transfer apparatus from  
218 Bio-Rad) and it was suspended in a blocking buffer (50 mM Tris-Cl pH 7.4, 150 mM NaCl, 0.1%  
219 Tween 20, and 5% skim milk) for 90 min at room temperature, similar to the study by (Isla et al.,  
220 1998). After washing with TBST (50 mM Tris-Cl pH 7.4, 150 mM NaCl, and 0.1% Tween 20)  
221 for 40 min, the membrane was incubated in a corresponding primary antibodies in a 1/1200  
222 dilution and polyclonal anti- Mouse IgG antibody from goat (Invitrogen) as a secondary antibody  
223 at room temperature. Immunodetection was performed using ECL Western Blotting Detection



224 Reagents (Amersham, Buckinghamshire, UK) and an Image Quant™ LAS 4000 system  
225 (Fujifilm, Tokyo, Japan).

226

### 227 **Extraction and thin layer chromatography (TLC) of kaempferol and quercetin**

228 Kaempferol and quercetin were extracted using 100 ml liquid culture grown for 7 days. The  
229 crude extracts were isolated using different extraction chemicals, their ratios and extraction time  
230 is given in **Supplementary Table 1**. Crude extracts were then separated into different fractions  
231 using a 100-cm-long silica cylinder. The fractions were dried in a rotary evaporator and  
232 dissolved in methanol and ethanol for further analysis on TLC. TLC was performed according to  
233 the standard method described by (Harborne, 1998) with minor modifications. Approximately 5  
234  $\mu$ l of 1 mg/ml extracts and the same amount of standard were loaded on the TLC plate (20  $\times$  20  
235 cm thickly coated with 0.4–0.5 nm silica gel) and dried with a drier; the extracts were then  
236 allowed to run in their respective mobile phases in the TLC chamber for 25 min. The developed  
237 plates were fully dried for 20 min at room temperature and then directly visualized in the TLC  
238 viewer under 366 nm UV light. The detected bands were matched with the reference compounds  
239 of kaempferol and quercetin. The matching bands were crumb and collected individually and  
240 eluted with methanol for further assistance.

241

## 242 **Results and discussion**

### 243 **Cloning and kaempferol and quercetin pathway design**

244 In recent years, many synthetic tools have been developed with regard to yeast engineering to  
245 produce value added secondary metabolites. The proposed pathway for biosynthesis of  
246 kaempferol and quercetin is depicted in (**Fig. 1**). Previous reports showed that *F3H* is a major  
247 member of flavonoid biosynthesis enzymes found in all organisms that enhances kaempferol and  
248 quercetin biosynthesis (Dixon et al., 1998). Additionally, researchers overexpressed whole genes  
249 related to flavonoid pathway in yeast (Trantas et al., 2009). The precursor of flavonoid pathway,  
250 p-coumaric acid synthesizes by two ways, either it synthesizes from tyrosine in tyrosine ammoni-  
251 lyase (TAL), or from phenylalanine in phenylalanine ammonialyase (PAL) pathway (Rodriguez

252 et al., 2017). Further it is demonstrated that, p-coumaric acid, activated by a 4- coumaroyl-CoA  
253 ligase (*4CL*) from *P. crispum* while, chalcone synthase (*CHS*) from *P. hybrid*, and chalcone  
254 isomerase (*CHI*) from *M. sativa* were used to convert the resulting p-coumaroyl-CoA into  
255 naringenin (Rodriguez et al., 2017). Many downstream metabolite synthesis pathways merge  
256 from naringenin depending on the activation enzymes. However, depending on the requirement,  
257 researchers cloned the entire pathway or a target step of flavonoid pathway, in the microbial  
258 factories (Marín et al., 2018).

259  
260 In this study, we used restriction-based cloning of complete ORF region of *OsF3H* gene ligated  
261 into pRS42k expression vector between PGK1 promoter and CYC1 terminator (**Supplementary**  
262 **Fig. 2A, 2B**). We first transformed the construct to *E. coli* for rapid and efficient multiplication,  
263 high copy numbers, and confirmation of ligation. Transformation and ligation were confirmed by  
264 plasmid isolation and digestion with corresponding restriction enzymes (**Fig. 2A**). The same  
265 construct isolated from *E. coli* was further transformed to *S. cerevisiae* for functional expression.  
266 Approximately 70% of the transformations were successful as 7 colonies were transformed out  
267 of 10 and the transformation was confirmed through colony PCR (**Fig. 2B**) and selection markers.  
268 Multiple copy numbers are essential to express heterologous genes in yeast; however,  
269 significant multiplication of heterologous genes puts pressure on cells and results which may  
270 causes uncertainty of the construct. To maintain the stability and optimum copy number of  
271 constructs, yeast episomal plasmid (YE<sub>p</sub>) vector was selected, which replicates autonomously  
272 because of the presence of a 2-micron region that acts as origin of replication. The 2-micron  
273 origin enhances the copy number, resulting in significant transformation: most of the YE<sub>p</sub>  
274 plasmids range from 5 to 30 copies per single cell (Fang et al., 2011; Mumberg et al., 1995). The  
275 engineered strain was induced by subjecting naringenin as a substrate for *OsF<sub>3</sub>H* gene, and the  
276 resulting titer was further analyzed using biotechnological tools for confirmation of *OsF<sub>3</sub>H* gene  
277 expression, and synthesis of kaempferol and quercetin. Empty and transformed stains of *E. coli*  
278 and yeast used in this study are shown in **Supplementary Fig S3**.

## 279 **TLC analysis**

280 TLC is one of the most important procedures to confirm the presence of related compounds in  
281 the extract by comparing the extract with the reference. To substantiate the confirmation of  
282 kaempferol and quercetin, TLC was performed using standard method (Harborne, 1998). After  
283 fractional distillation and rotary evaporation, a minute quantities (1 mg/ml) of extracts of  
284 different profiles were dissolved in their relative solvents along with the same concentration of  
285 standard kaempferol and quercetin. TLC profiling was used to indicate the most prominent  
286 extract by comparing the extracted kaempferol and quercetin with the standards. Different  
287 chromatographic systems (Table 1) of different solvents as a mobile phase were used in random  
288 concentration and a favorable solvent that clearly separated kaempferol and quercetin was  
289 selected. Different solvent profiles analysis results confirmed that toluene:ethyl acetate:formic  
290 acid (7:3:0.5) separated kaempferol and quercetin significantly as shown in Fig. 2C. These  
291 results also revealed that there was no difference between R<sub>f</sub> of standard and that of the extracted  
292 sample. However, the R<sub>f</sub> of kaempferol was found higher than that of quercetin in all the mobile  
293 phases. Similarly, quercetin was appeared before kaempferol, which shows that quercetin is  
294 more polar than kaempferol (Tang et al., 2001). The bands appeared on the TLC plate  
295 authenticated that flavonol 3-hydroxylase enzyme catalysed naringenin into kaempferol and  
296 quercetin.

297

### 298 ***OsF<sub>3</sub>H* expression in yeast and enzyme assay**

299 To further confirm *F<sub>3</sub>H* activity and protein expression level, the transformed yeast as well as  
300 empty yeast (having an empty pRS42K vector) were grown for 24 h at 30°C. After 24 h,  
301 naringenin was added to the cultured media of the transformed strain and proteins were isolated  
302 at three time points: 2 h, 12 h and 24 h. The enzymatic activity of *F<sub>3</sub>H* was determined by the  
303 level of recombinant protein expression among the three time points via Western blotting.  
304 Further, immunoblotting was performed with equal protein volumes by making standard curve to  
305 estimate the expression level of the recombinant protein. Our results confirmed that the empty  
306 vector does not produced the target protein similar to transformed strain which shows lack of  
307 *F<sub>3</sub>H* activity. Thus, it was proved that *S. cerevisiae* has no *F<sub>3</sub>H* activity and only transformation  
308 with *OsF<sub>3</sub>H* is responsible for the recombinant protein production. On comparing the expression

309 level at each time point, it was assumed that the expression levels slightly increased after each  
310 interval because of the continuous catalytic activity of the enzyme (Fig. 2D). This phenomenon  
311 predicts that continuous availability of the substrate increases the enzymatic activity of *OsF<sub>3</sub>H*  
312 gene because of constant conversion of naringenin into its product. Selection of a suitable and  
313 applicable recombinant protein expression system play a key role in protein expression technique.  
314 To achieve a high-level protein expression, we selected a well characterized promoter PGK1 and  
315 CYC1 terminator, to control the target protein expression of cDNA in host cell, as promoter is  
316 the most characterized genetic segment in many yeast expression system (Wagner and Alper,  
317 2016). It has been reported that, heterologous protein production and high degree transferability  
318 commonly relied on promotor of *S. cerevisiae* like PGK1 and terminator such as CYC1t  
319 (Wagner and Alper, 2016). Selection of a weak promoter can be discouraged due to low level of  
320 transcription of foreign gene, and consequently production of low amount of recombinant protein.  
321 Similarly, selecting of strong promoter also not recommended all the time due to high level of  
322 transcription of foreign gene which can cause a severe stress and can led the cell to death in case  
323 of unfolded protein response (UPR). In such case, demands on protein folding and protein size  
324 are fundamental for choosing a proper promoter. In this regard we reviewed previous literature  
325 for the most frequently using promoter and terminator, and selected PGK1 and CYC1t promoter  
326 and terminator respectively and no damage were founded which predicts that the target gene  
327 were expressed in a controlled circumstances.

### 328 **Identification of kaempferol and quercetin via nuclear magnetic resonance (NMR)**

329 NMR spectroscopy was used to identify a compound by the demonstration of type, number, and  
330 position of atoms in a molecule. It is a comprehensive study involving the renovation of the  
331 chemical structure of a compound architecture by generating detailed information about carbon  
332 and hydrogen atoms in the structure. Currently, NMR application is one of the most significant  
333 tools for structure analysis of flavonoids. In the current study, we used NMR spectroscopy to  
334 further identify our target compound through structural evaluation. After TLC identification the  
335 engineered strain fractions were further analyzed for identification by <sup>1</sup>H and <sup>13</sup>C NMR (Fig.  
336 3A). Deuteriochloroform is a common solvent used for direct NMR analysis of many flavonoids,  
337 generally isoflavones, flavones, and flavonols. We used Methanol D from Cambridge Isotope

338 Laboratories (CIL), USA, as most naturally occurring flavonoids (all flavonoid glycosides) are  
339 slightly soluble in deuteriochloroform. However, they are highly soluble in methanol, ethanol,  
340 and their derivatives. Samples subjected to NMR analysis revealed only a single compound, the  
341 structure was illustrated as quercetin. <sup>1</sup>H-NMR (600 MHz) δH: 6.41 (1H, d, J = 2.4 Hz), 6.20  
342 (1H, d, J = 2.4 Hz), 7.75 (1H, d, J = 3.0 Hz), 6.91 (1H, d, J = 9.6 Hz), 7.66-7.64 (1H, dd, J = 9.6,  
343 3.0 Hz). <sup>13</sup>C-NMR (125 MHz) δC: 148.3 (C-2), 137.5 (C-3), 177.6 (C-4), 162.7 (C-5), 99.5 (C-  
344 6), 165.9 (C-7), 94.7 (C-8), 158.5 (C-9), 104.8 (C-10), 124.4 (C-1'), 116.3 (C-2'), 146.5 (C-3'),  
345 148.3 (C-4'), 116.5 (C-5'), 121.9 (C-6'). It was recognized as quercetin by comparing with the  
346 spectroscopically analyzed data reported in the literature (Ma et al., 2007). With the  
347 identification of quercetin and the lack of kaempferol, it is predicted that kaempferol is produced  
348 in a very low quantity because NMR detects a very decent amount and highest purity level of  
349 compounds. Furthermore, sometimes a single enzyme can catalyze one step of the reaction more  
350 efficiently than the other step. It is also possible that the expression of *OsF<sub>3</sub>H* gene in yeast  
351 significantly converts naringenin into dihydrokaempferol and dihydroquercetin, and at the same  
352 time, also converts the intermediates into quercetin only. The illustrated structure shows the  
353 hydroxyl groups attached on 3, 4, 5, and 7 (Fig. 3b) positions.

354

### 355 ***In vivo* activity of *OsF<sub>3</sub>H* in yeast and quantification of kaempferol and quercetin via** 356 **LCMS-MS**

357 Due to the high pharmaceutical importance of both kaempferol and quercetin, microbial based  
358 synthesis of both compounds is a potential approach to enhance its low production in plants. The  
359 LC-MS profiles of the *OsF<sub>3</sub>H* assay are shown in Fig. 4. The enzymatic activity of different  
360 enzymes expands naringenin metabolism to different pathways responsible for the synthesis of  
361 diverse classes of flavonoids. Substrate conversion to kaempferol and quercetin is caused by the  
362 addition of single and double hydroxyl groups to naringenin, which is catalyzed by *F<sub>3</sub>H* (Deboo  
363 et al., 1995). Our finding shows that using naringenin as a substrate, the recombinant yeast  
364 expressing *OsF<sub>3</sub>H* gene successfully metabolized naringenin directly into kaempferol and  
365 quercetin which is a novel step discovered and elucidated for the first time. The control strain  
366 having an empty vector showed the lack of kaempferol and quercetin accumulation, indicating

367 that *F<sub>3</sub>H* is responsible for naringenin conversion to both compounds. Results showed that  
368 metabolism of naringenin increased after each time point, which decreased the naringenin and  
369 significantly ( $p \leq 0.05$ ) increased kaempferol and quercetin (Fig. 4A). LC-MS results also  
370 indicated that *OsF<sub>3</sub>H* metabolized naringenin to kaempferol more significantly than to quercetin.  
371 The transformed strain synthesized  $8.10 \pm 3.81$  mg/l,  $12.13 \pm 5.04$  mg/l, and  $19.13 \pm 1.29$  mg/l of  
372 kaempferol and  $5.42 \pm 1.25$  mg/l,  $7.56 \pm 0.86$  mg/l, and  $8.67 \pm 0.39$  mg/l of quercetin after 2, 12  
373 and 24 h, respectively. The concentration of naringenin in the titer also decreased gradually  
374 along with the increases of both metabolites, showing that *OsF<sub>3</sub>H* strongly catalyzed the reaction  
375 (Fig. 4A).

376 Our evaluation and analysis showed that this is a novel finding and *OsF<sub>3</sub>H* gene is responsible  
377 for catalyzing naringenin metabolism directly to kaempferol and quercetin without the  
378 involvement of *FLS*. Previously it was reported naringenin conversion to dihydrokaempferol via  
379 *F<sub>3</sub>H*, which is further converted to kaempferol via flavonol synthase and at last, kaempferol is  
380 converted to conversion to quercetin via *F<sub>3</sub>H* (Crozier et al., 2009; Stahlhut et al., 2015) in higher  
381 plants. Similarly, Marín et al. (2018) recently reported that naringenin is a substrate metabolized  
382 to dihydrokaempferol in the presence of naringenin 3-dioxygenase (*N<sub>3</sub>DOX*), which is further  
383 converted to kaempferol and also to dihydroquercetin via *FLS* and *F<sub>3</sub>H*, respectively.  
384 Additionally, it has been also reported that, silencing of *FLS* in plants reduces quercetin  
385 production which mean that without *FLS* quercetin can also produces (Mahajan et al., 2011). The  
386 production of quercetin without *FLS* activity validates that not only *FLS* is responsible for the  
387 hydroxylation of dihydroquercetin, which converts to quercetin, but some other enzymes are also  
388 responsible for the addition of the OH groups. Flavonoid biosynthesis pathway affirms that  
389 naringenin converts to kaempferol and quercetin by hydroxylation depending on enzymes  
390 specificity by using O<sub>2</sub> and NADPH (Leonard et al., 2006). Our finding suggests that *OsF<sub>3</sub>H*  
391 gene is responsible for the addition of OH group to naringenin, dihydrokaempferol, and  
392 dihydroquercetin for synthesizing both kaempferol and quercetin.

393

## 394 **Conclusion**

395 Using of yeast as a recombinant protein expression system is an easy and short way to  
396 characterize a target gene of higher plants. Selection of appropriate plasmid with appropriate

397 promoter and terminator is the key to success of foreign gene expression in the yeast. In current  
398 study we used *S. cerevisiae* D452-2 strain and pRS42k plasmid having frequently using PGK1  
399 promoter and CYC1t terminator. Here, we cloned rice *OsF3H* gene in yeast expression vector  
400 and functionally expressed in yeast. Here we discovered and evaluated a novel step for the first  
401 time in the conversion of naringenin to kaempferol and quercetin by the catalytic activity of *F3H*.  
402 The strain containing *OsF3H* gene showed significant synthesis of kaempferol and quercetin by  
403 using naringenin as a substrate which is confirmed through TLC, NMR and LCMS-MS analysis  
404 while, recombinant protein expression were confirmed through western blotting. With regard to  
405 future prospective, this study may help to overexpress *OsF<sub>3</sub>H* gene and assist multifunctional  
406 secondary metabolites flavonol biosynthesis in rice plants.

407

408 **Supplementary Data**

409 **Fig. S1.** Standard calibration curve for measuring protein concentration using BSA as a protein  
410 standard.

411 **Fig. S2.** Diagrammatic representation of ligation.

412

413 **Fig. S3.** Yeast and *E. coli* strain growth on their respective media.

414

415 **Table S1.** Solvents and conditions used for kaempferol and quercetin extraction.

416

417

418 **Acknowledgments**

419 This work was supported by the National Research Foundation of Korea Grant funded by the  
420 Korean Government (NRF-2017R1D1A3B04028676), and Brain Korea Plus (BK+). The authors  
421 declare no competing interest.

422

423 **Author contributions**

424 RJ and KKM designed the experiments. RJ and SA performed experiment and analyzed the data.  
425 SP and SL performed HPLC analysis. RJ and SA analyzed NMR data and statistical analysis. RJ  
426 and KKM wrote the manuscript.



## References

- Batubara, I., Suarto, I.H., Wulandari, N.S., 2017.** The Best Extraction Technique for Kaempferol and Quercetin Isolation from Guava Leaves (*Psidium guajava*). *Earth and environmental sciences* 58, 012060.
- Bradford, M.M., 1976.** A rapid and sensitive method for the quantitation of microgram quantities of protein utilizing the principle of protein-dye binding. *Analytical biochemistry* 72, 248-254.
- Buer, C.S., Imin, N., Djordjevic, M.A., 2010.** Flavonoids: New Roles for Old Molecules. *Journal of Integrative Plant Biology* 52, 98-111.
- Chen, A.Y., Chen, Y.C., 2013.** A review of the dietary flavonoid, kaempferol on human health and cancer chemoprevention. *Food chemistry* 138, 2099-2107.
- Chen, J.-Y., Wen, P.-F., Kong, W.-F., Pan, Q.-H., Zhan, J.-C., Li, J.-M., Wan, S.-B., Huang, W.-D., 2006.** Effect of salicylic acid on phenylpropanoids and phenylalanine ammonia-lyase in harvested grape berries. *Postharvest Biology and Technology* 40, 64-72.
- Chen, S., Xiang, Y., Deng, J., Liu, Y., Li, S., 2013.** Simultaneous Analysis of Anthocyanin and Non-Anthocyanin Flavonoid in Various Tissues of Different Lotus (*Nelumbo*) Cultivars by HPLC-DAD-ESI-MSn. *PLOS ONE* 8, e62291.
- Chou, R.H., Hsieh, S.C., Yu, Y.L., Huang, M.H., Huang, Y.C., Hsieh, Y.H., 2013.** Fisetin inhibits migration and invasion of human cervical cancer cells by down-regulating urokinase plasminogen activator expression through suppressing the p38 MAPK-dependent NF-kappaB signaling pathway. *PLoS One* 8, e71983.
- Crozier, A., Jaganath, I.B., Clifford, M.N., 2009.** Dietary phenolics: chemistry, bioavailability and effects on health. *Natural product reports* 26, 1001-1043.
- Deboo, G.B., Albertsen, M.C., Taylor, L.P., 1995.** Flavanone 3-hydroxylase transcripts and flavonol accumulation are temporally coordinate in maize anthers. *The Plant journal : for cell and molecular biology* 7, 703-713.
- Dixon, R.A., Howles, P.A., Lamb, C., He, X.-Z., Reddy, J.T., 1998.** Prospects for the Metabolic Engineering of Bioactive Flavonoids and Related Phenylpropanoid Compounds, in: Manthey, J.A., Buslig, B.S. (Eds.), *Flavonoids in the Living System*. Springer US, Boston, MA, pp 55-66.
- Dixon, R.A., Steele, C.L., 1999.** Flavonoids and isoflavonoids - a gold mine for metabolic engineering. *Trends in plant science* 4, 394-400.
- Duan, L., Ding, W., Liu, X., Cheng, X., Cai, J., Hua, E., Jiang, H., 2017.** Biosynthesis and engineering of kaempferol in *Saccharomyces cerevisiae*. *Microb Cell Fact* 16, 165.
- Fang, F., Salmon, K., Shen, M.W., Aeling, K.A., Ito, E., Irwin, B., Tran, U.P., Hatfield, G.W., Da Silva, N.A., Sandmeyer, S., 2011.** A vector set for systematic metabolic engineering in *Saccharomyces cerevisiae*. *Yeast (Chichester, England)* 28, 123-136.
- Gietz, R.D., Schiestl, R.H., 2007.** Quick and easy yeast transformation using the LiAc/SS carrier DNA/PEG method. *Nature protocols* 2, 35-37.
- Grotewold, E., 2005.** Plant metabolic diversity: a regulatory perspective. *Trends in plant science* 10, 57-62.
- Gutierrez, A., Velasco, A.G.-V., Lucas, J.A., Gutierrez-Mañero, F.J., Ramos-Solano, B., 2017.** The Flavonol-Anthocyanin Pathway in Blackberry and Arabidopsis: State of the Art. *State of the Art*.
- Harborne, A.J., 1998.** *Phytochemical methods, a guide to modern techniques of plant analysis*. Springer Pvt. Ltd, New Delhi, India.

- Isla, M.I., Vattuone, M.A., Sampietro, A.R.,** 1998. Essential group at the active site of Frapaeoluminvertase. *Phytochemistry*, 1189-1193.
- Kaur, N., Gupta, R.C.,** 2018. Simultaneous determination of kaempferol and quercetin in *Heteropogon Contortus* (L.) Beauv. by validated high-performance thin layer chromatography. *Communications in Soil Science and Plant Analysis* 49, 2247-2255.
- Kim, Y.B., Kim, K., Kim, Y., Tuan, P.A., Kim, H.H., Cho, J.W., Park, S.U.,** 2014. Cloning and Characterization of a Flavonol Synthase Gene from *Scutellaria baicalensis*. *The Scientific World Journal* 2014, 7.
- Laemmli, U.K.,** 1970. Cleavage of Structural Proteins during the Assembly of the Head of Bacteriophage T4. *Nature* 227, 680-685.
- Leonard, E., Yan, Y., Koffas, M.A.,** 2006. Functional expression of a P450 flavonoid hydroxylase for the biosynthesis of plant-specific hydroxylated flavonols in *Escherichia coli*. *Metabolic engineering* 8, 172-181.
- Lepiniec, L., Debeaujon, I., Routaboul, J.-M., Baudry, A., Pourcel, L., Nesi, N., Caboche, M.,** 2006. Genetics and biochemistry of seed flavonoids. *Annual review of plant biology* 57, 405-430.
- Ling, M., Merante, F., Robinson, B.H.,** 1995. A rapid and reliable DNA preparation method for screening a large number of yeast clones by polymerase chain reaction. *Nucleic Acids Res* 23, 4924-4925.
- Ma, X.-M., Liu, Y., Shi, Y.-P.,** 2007. Phenolic Derivatives with Free-Radical-Scavenging Activities from *Ixeridium gracile* (DC.) Shih. *Chemistry & Biodiversity* 4, 2172-2181.
- Mahajan, M., Ahuja, P.S., Yadav, S.K.,** 2011. Post-transcriptional silencing of flavonol synthase mRNA in tobacco leads to fruits with arrested seed set. *PLoS One* 6, e28315.
- Marica, M.-S., Jasprića, I., Asja, S.-B., Mornar, A.,** 2004. Optimization of Chromatographic Conditions in Thin Layer Chromatography of Flavonoids and Phenolic Acids. *CROATICA CHEMICA ACTA* 77, 361-366.
- Marín, L., Gutiérrez-del-Río, I., Entrialgo-Cadierno, R., Villar, C.J., Lombó, F.,** 2018. De novo biosynthesis of myricetin, kaempferol and quercetin in *Streptomyces albus* and *Streptomyces coelicolor*. *PLOS ONE* 13, e0207278.
- Martens, S., Mithofer, A.,** 2005. Flavones and flavone synthases. *Phytochemistry* 66, 2399-2407.
- Miyahisa, I., Funa, N., Ohnishi, Y., Martens, S., Moriguchi, T., Horinouchi, S.,** 2006. Combinatorial biosynthesis of flavones and flavonols in *Escherichia coli*. *Applied microbiology and biotechnology* 71, 53-58.
- Mumberg, D., Muller, R., Funk, M.,** 1995. Yeast vectors for the controlled expression of heterologous proteins in different genetic backgrounds. *Gene* 156, 119-122.
- Muthukrishnan, S.D., Kaliyaperumal, A., Subramanian, A.,** 2015. Identification and determination of flavonoids, carotenoids and chlorophyll concentration in *Cynodon dactylon* (L.) by HPLC analysis. *Nat Prod Res* 29, 785-790.
- Ozcelik, B., Orhan, I., Toker, G.,** 2006. Antiviral and antimicrobial assessment of some selected flavonoids. *Zeitschrift fur Naturforschung. C, Journal of biosciences* 61, 632-638.
- Rodriguez, A., Strucko, T., Stahlhut, S.G., Kristensen, M., Svendsen, D.K., Forster, J., Nielsen, J., Borodina, I.,** 2017. Metabolic engineering of yeast for fermentative production of flavonoids. *Bioresour Technol* 245, 1645-1654.
- Sajeeth, C.I., Manna, P.K., Manavalan, R., C.I., J.,** 2010. Quantitative estimation of Gallic Acid, Rutin and Quercetin in certain herbal plants by hptlc method *Pelagia Research Library* 80-85
- Sherman, F.,** 2002. Getting started with yeast, in: Guthrie, C., Fink, G.R. (Eds.), *Methods in enzymology*. Academic Press, pp 3-41.
- Srivastava, N., Srivastava, A., Srivastava, S., Rawat, A.K., Khan, A.R.,** 2016. Simultaneous Quantification of Syringic Acid and Kaempferol in Extracts of *Bergenia* Species Using Validated High-Performance Thin-Layer Chromatographic-Densitometric Method. *Journal of chromatographic science* 54, 460-465.

- Stahlhut, S.G., Siedler, S., Malla, S., Harrison, S.J., Maury, J., Neves, A.R., Forster, J.,** 2015. Assembly of a novel biosynthetic pathway for production of the plant flavonoid fisetin in *Escherichia coli*. *Metabolic engineering* 31, 84-93.
- Subramanian, S., Stacey, G., Yu, O.,** 2007. Distinct, crucial roles of flavonoids during legume nodulation. *Trends in plant science* 12, 282-285.
- Tahara, S.,** 2007. A Journey of Twenty-Five Years through the Ecological Biochemistry of Flavonoids. *Bioscience, biotechnology, and biochemistry* 71, 1387-1404.
- Tang, Y., Lou, F., Wang, J., Li, Y., Zhuang, S.,** 2001. Coumaroyl flavonol glycosides from the leaves of *Ginkgo biloba*. *Phytochemistry* 58, 1251-1256.
- Trantas, E., Panopoulos, N., Ververidis, F.,** 2009. Metabolic engineering of the complete pathway leading to heterologous biosynthesis of various flavonoids and stilbenoids in *Saccharomyces cerevisiae*. *Metabolic engineering* 11, 355-366.
- Wagner, J.M., Alper, H.S.,** 2016. Synthetic biology and molecular genetics in non-conventional yeasts: Current tools and future advances. *Fungal genetics and biology : FG & B* 89, 126-136.
- Yadav, S., Kumar, P.,** 2012. Production, isolation and identification of flavonoids from aerial parts of *hiptage benghalensis*. *International Journal of Life science and Pharma Research (IJLPR)*, 1-5.
- Yin, R., Messner, B., Faus-Kessler, T., Hoffmann, T., Schwab, W., Hajirezaei, M.-R., von Saint Paul, V., Heller, W., Schäffner, A.R.,** 2012. Feedback inhibition of the general phenylpropanoid and flavonol biosynthetic pathways upon a compromised flavonol-3-O-glycosylation. *Journal of experimental botany* 63, 2465-2478.
- Zang, Y., Sato, H., Igarashi, K.,** 2011. Anti-diabetic effects of a kaempferol glycoside-rich fraction from unripe soybean (*Edamame*, *Glycine max* L. Merrill. 'Jindai') leaves on KK-A(y) mice. *Bioscience, biotechnology, and biochemistry* 75, 1677-1684.

**Table 1. Optimized mobile phases, ratio of solvents used for TLC and Rf values of kaempferol and quercetin**

| Chromatographic system | Solvent                                                | Ratio            | Rf value of kaempferol | Rf value of quercetin | References                |
|------------------------|--------------------------------------------------------|------------------|------------------------|-----------------------|---------------------------|
| 1                      | ethyl acetate: glacial acetic acid: formic acid: water | 100:11:1<br>1:25 | 0.49                   | 0.35                  | (Sajeeth et al., 2010)    |
| 2                      | Benzene: Acetic Acid: Water                            | 125:72:3         | 0.35                   | 0.24                  | (Yadav and Kumar, 2012)   |
| 3                      | n-butanol, acetic acid, water                          | 4:01:05          | 0.45                   | 0.31                  | (Yadav and Kumar, 2012)   |
| 4                      | toluene : ethyl acetate : formic acid                  | 5:04:01          | 0.36                   | 0.24                  | (Srivastava et al., 2016) |
| 5                      | n-hexane:ethylacetate:acetic acid                      | 31:14:5          | 0.28                   | 0.18                  | (Marica et al., 2004)     |
| 6                      | toluene: ethyl acetate: formic acid                    | 7: 3: 0.5        | 0.44                   | 0.32                  | (Kaur and Gupta, 2018)    |

### Table S1

Table 1. Solvents and conditions used for Kaempferol and quercetin extraction

| System number | Chemical | Percentage | Condition and time | References              |
|---------------|----------|------------|--------------------|-------------------------|
| 1             | Ethanol  | 100        | RT/1week           | (Batubara et al., 2017) |
| 2             | Methanol | 85         | 3hrs sonication    | (Batubara et al., 2017) |
| 3             | Ethanol  | 70         | 70°C               | (Batubara et al., 2017) |

## Figure legends

**Fig. 1. Schematic representation of the flavonoid biosynthetic pathways proposed for the significant production of kaempferol and quercetin in different organisms.** Encircled genes shows the differences of gene regulation responsible for different steps regulation among the different organisms pathways. Naringenin is a basic substrate of all these pathways synthesize from phenylalanine which is originated from shikimate pathway through a series of enzymatic reactions. Basically these pathways shows that naringenin converted to dihydrokaempferol by the catalytic activity of F3H and further it also converts dihydrokaempferol into dihydroquercetin. While both of them further converts into kaempferol and quercetin by activation of FLS. (A) In yeast, expression of N3COX is a responsible gene for conversion of naringenin into dihydrokaempferol and also F3H converts kaempferol into quercetin which is different from other organisms. (B) In bacteria, expression of FMO/CPR shows conversion of kaempferol into quercetin. (C) Arabidopsis shows the basic pathway of kaempferol and quercetin synthesis. (D) In lotus, DFR is responsible for conversion of dihydrokaempferol into kaempferol while, gene responsible for quercetin synthesis is unknown. (E) Synthesis of quercetin in blackberry is different from the rest, because kaempferol first converts to dihydroquercetin by activation of F3H which further converts into quercetin by FLS. (E) Our proposed pathway shows that F3H is not only responsible for the conversion of naringenin into dihydrokaempferol and dihydroquercetin, but can also converted naringenin directly to kaempferol and quercetin represented by the dotted arrow. However it also synthesis the intermediate dihydrokaempferol and dihydroquercetin, which then converts to kaempferol and quercetin via FLS activity. We also predicts due to previous study that, F3H is also responsible for the conversion of kaempferol to quercetin.

**Fig. 2. Transformation and functional expression of *OsF3H* gene in yeast.** (A) Colony PCR of *OsF3H* gene transformed to *S. cerevisiae* (D452-2) strain. (B) Transformation confirmation of *OsF3H* gene in *Escherichia coli* cells using pRS42K yeast expression vector. The plasmids of five confirmed colonies are digested with BamH1 and Xho1 restriction enzymes: upper bands show plasmid size, while the lower ones indicate gene size. (C) TLC detection of kaempferol and quercetin at 366 nm UV light. Two samples are analyzed after fractionation through a silica column indicated as S1 and S2, i.e., sample one and two, respectively. At the same time,

standards are also run for comparison as represented by KS for kaempferol standard and QS for quercetin standard, whereas K represents kaempferol and Q represents quercetin bands. (D) Immunoblotting of yeast recombinant protein translated from *OsF<sub>3</sub>H* gene. The same amount of transformed strain (each time point) and empty strain protein are prepared and subjected to immunoblotting along with gene-specific antibodies (rabbit anti-CHS chalcone synthase from Sigma Aldrich). SDS-PAGE analysis does not detect the target protein in the empty strains and these are not further analyzed by immunoblotting analysis. At 2, 12, and 24 h represent the time points at which the protein was extracted from yeast strain feeding on substrate.

**Fig. 3. C13 NMR results of quercetin and proposed structure of quercetin.** (A) NMR spectra of quercetin, (B) the proposed structure of quercetin.

**Fig. 4. Analysis of naringenin conversion to kaempferol and quercetin using an engineered yeast system expressing *OsF<sub>3</sub>H* gene using LCMS-MS.** (A) LCMS-MS profiling of naringenin, kaempferol, and quercetin. Bars represent mean  $\pm$  standard deviation, asterisks indicate significant difference ( $p \leq 0.05$  two-way ANOVA, Bonferroni post-test) among naringenin, kaempferol, and quercetin after each time point. (B-D) Extracted ion chromatograms of internal standards (naringenin, kaempferol, and quercetin) in samples extracted after induction in *Ox<sub>F</sub><sub>3</sub>H* yeast for 2, 12, and 24 h.

Fig. 1

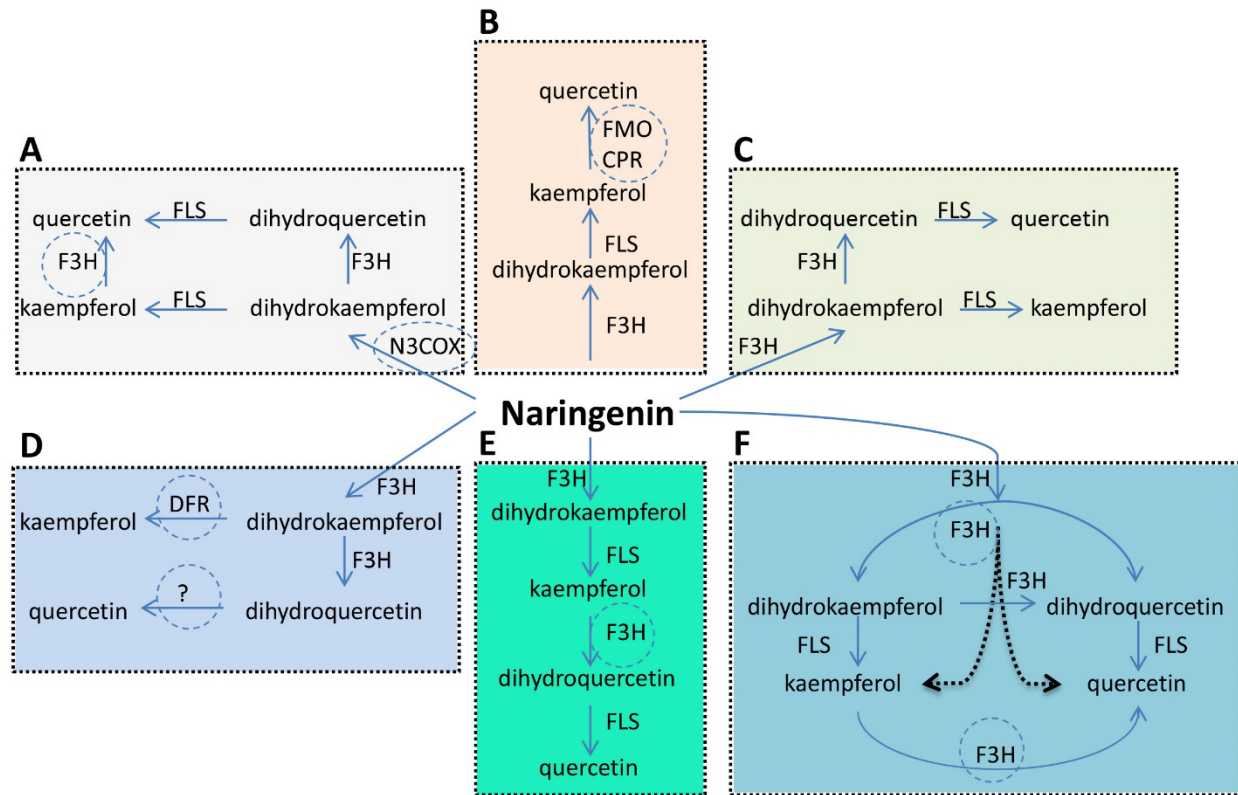



Fig. 2

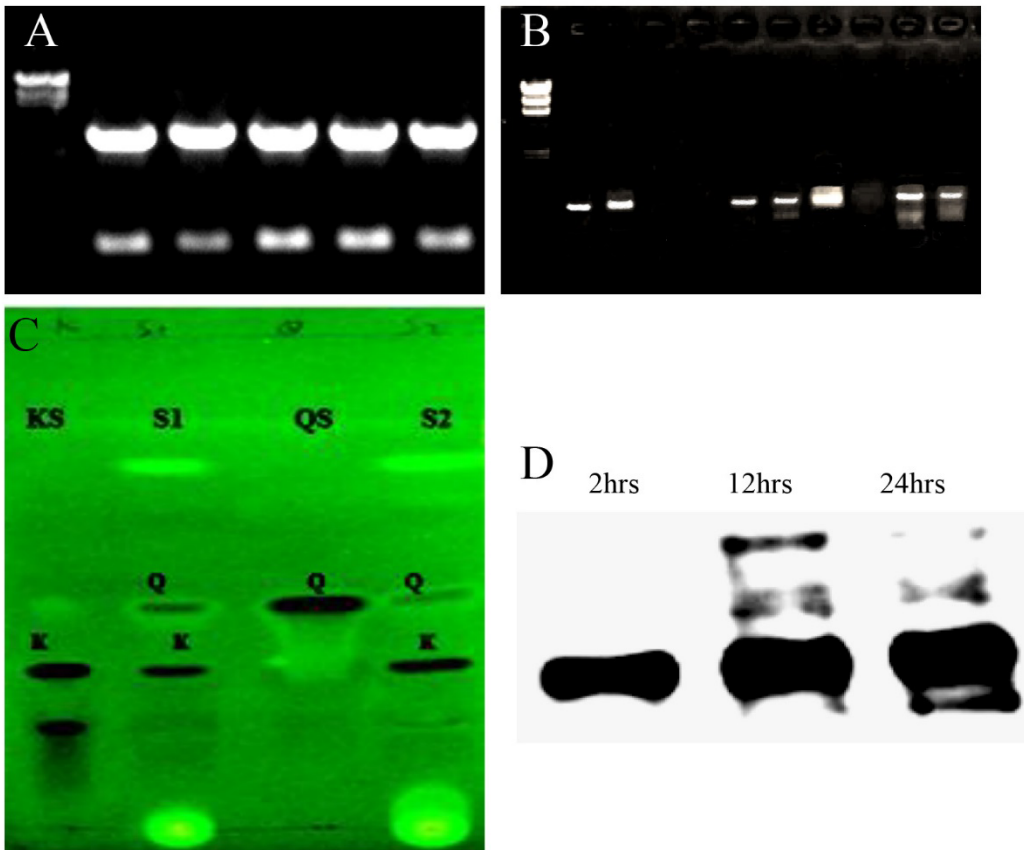

Fig. 3

Figure 3 A

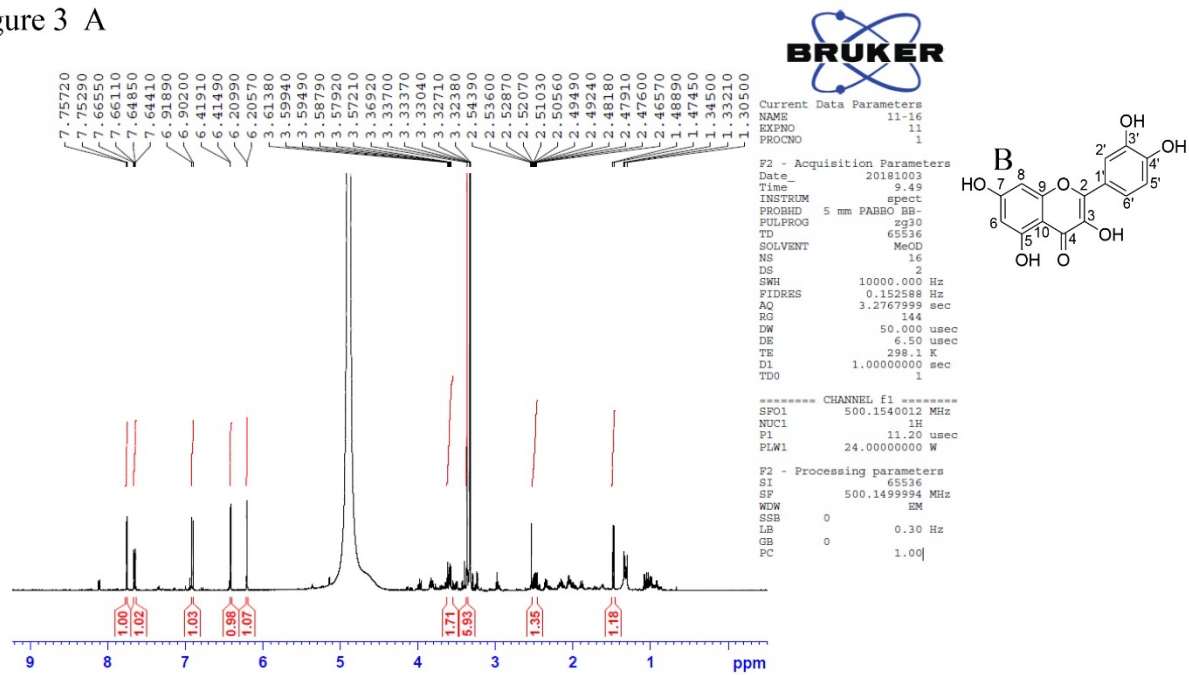

Fig. 4

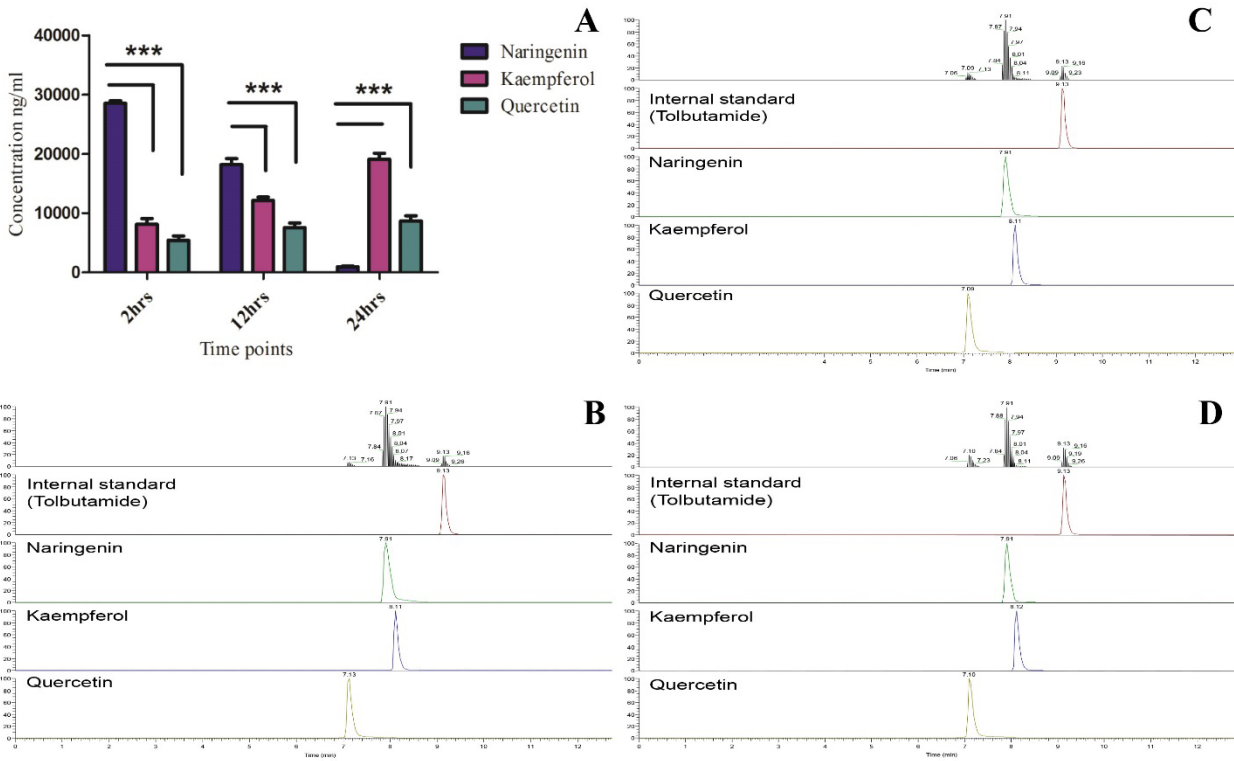

Supplementary Fig 1

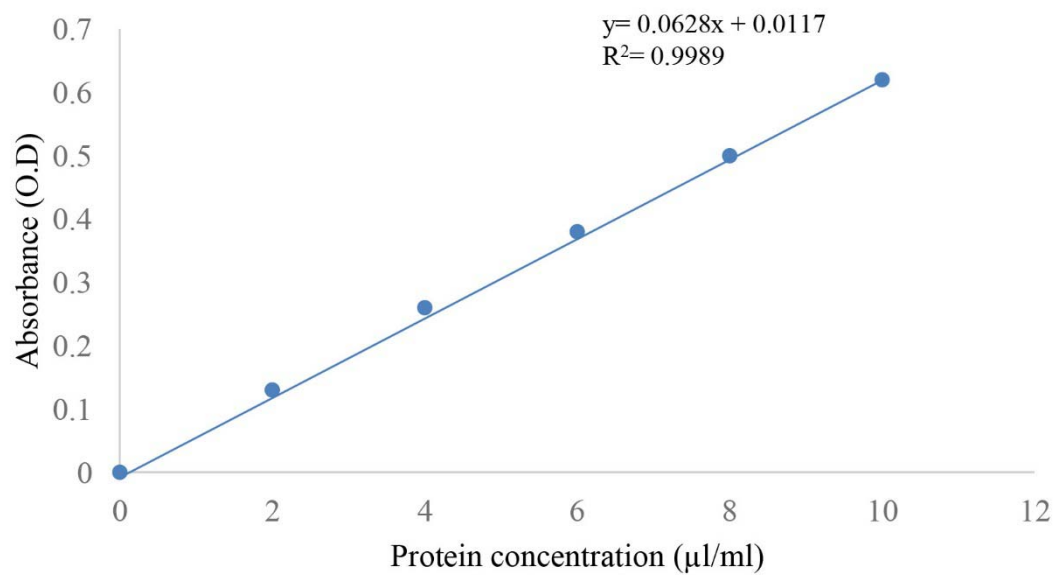

## Supplementary Fig 2

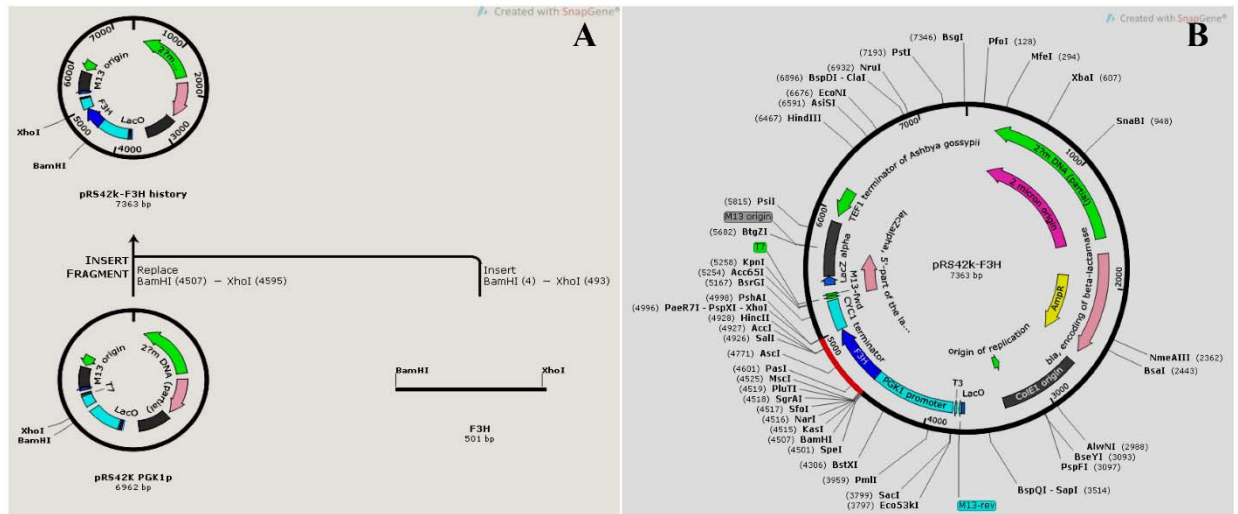

Supplementary Fig 3

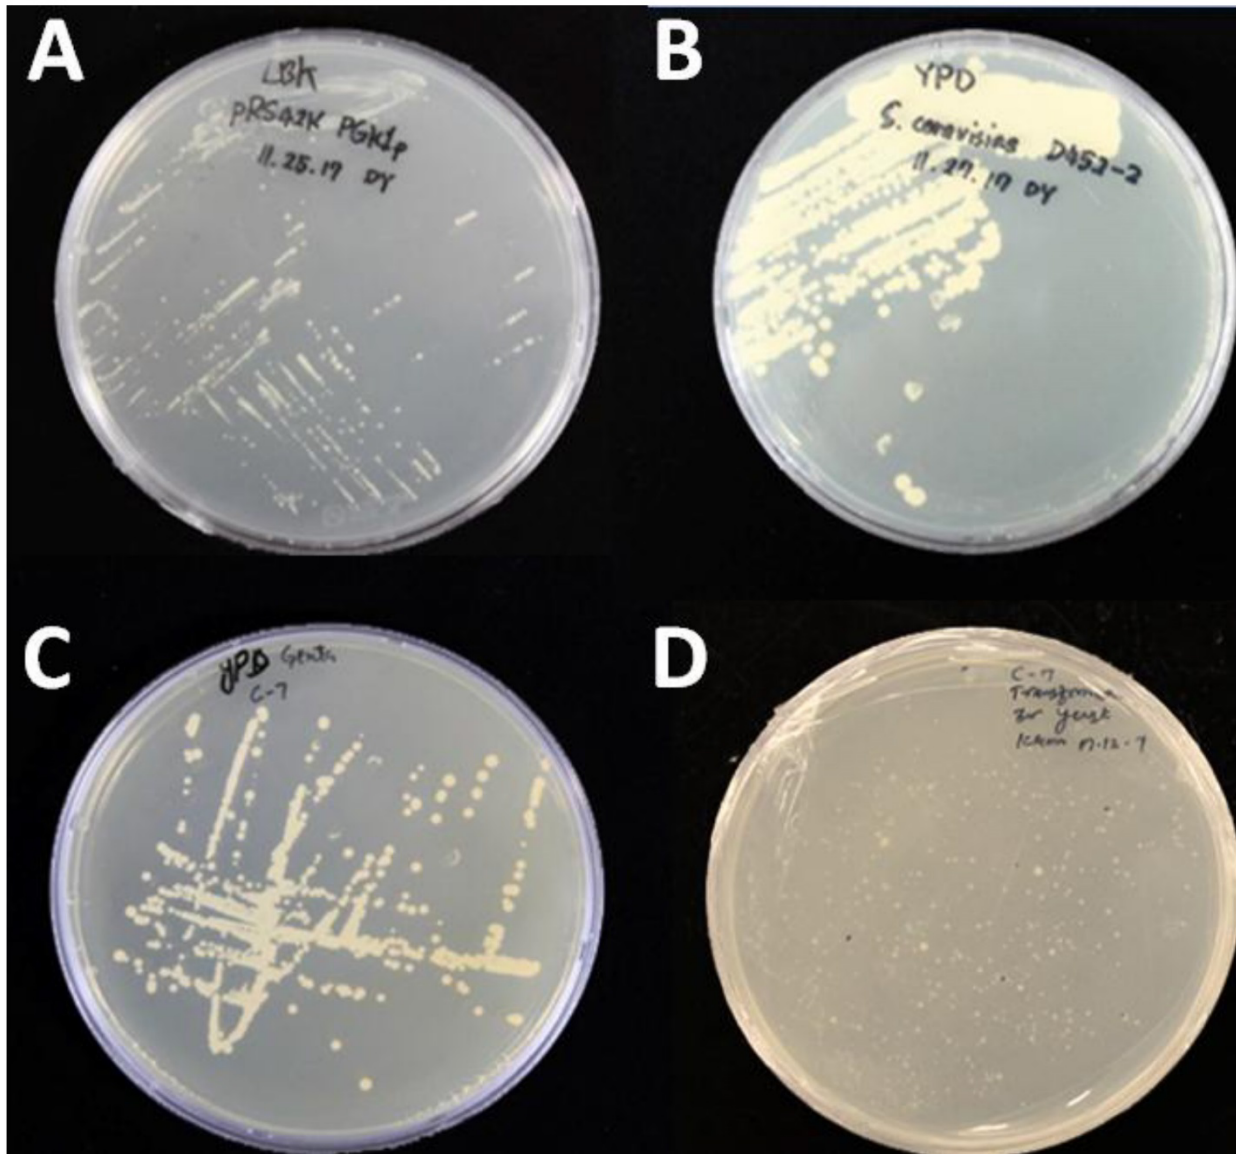

Source: https://www.biorxiv.org/content/10.1101/753210v1.full.pdf
